# Supplementary material for: Is being a 'left-behind' child associated with an increased risk of self-poisoning in adulthood? Findings from a case–control study in Sri Lanka
Source: PubMed Central journal article supplement (PMC7925243; doi:10.1136/bmjgh-2020-003734), 2021-03-01
Supplement: bmjgh-2020-003734supp001.pdf [file bmjgh-2020-003734supp001.pdf]

Supplementary material for manuscript: *Is being a left-behind child associated with an increased risk of self-poisoning in adulthood? – findings from a case control study in Sri Lanka*

### Supplementary figure 1 – Participant recruitment for cases and controls

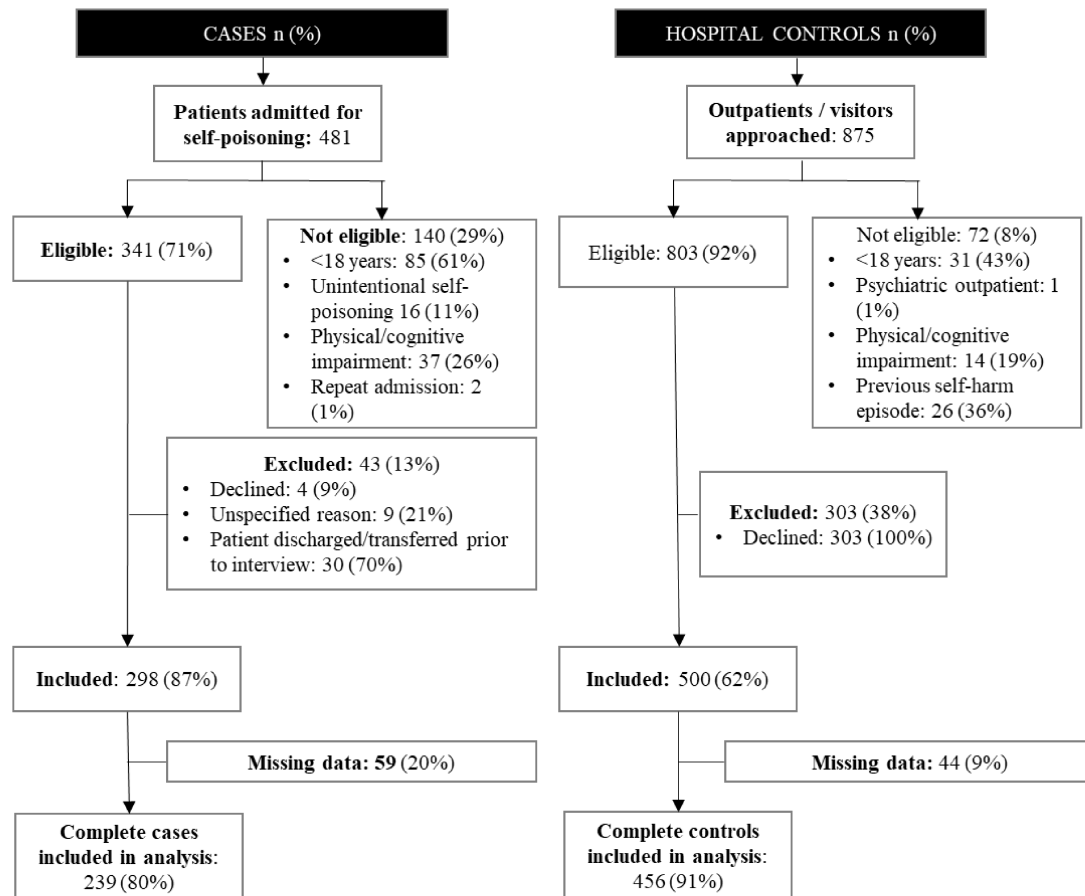

Supplementary material for manuscript: *Is being a left-behind child associated with an increased risk of self-poisoning in adulthood? – findings from a case control study in Sri Lanka*

**Supplementary table 1 - Adjusted and sex-stratified associations of parental emigration and hospital presentation for self-poisoning in adulthood (Community controls)**

|         |                        | n(%)       |                   |                   |                   |
|---------|------------------------|------------|-------------------|-------------------|-------------------|
|         |                        | Cases      | Controls          | Model 1           | Model 2           |
| Overall | Parental migration     |            |                   |                   |                   |
|         | No                     | 178 (74.5) | 321 (78.3)        | 1                 | 1                 |
|         | Yes                    | 61 (25.5)  | 89 (21.7)         | 1.09 (0.74, 1.60) | 1.08 (0.72, 1.60) |
|         | Which parent migrated? |            |                   |                   |                   |
|         | No migration           | 178 (74.5) | 321 (78.3)        | 1                 | 1                 |
|         | Maternal               | 36 (15.1)  | 55 (13.4)         | 1.05 (0.66, 1.68) | 0.95 (0.59, 1.55) |
|         | Paternal               | 21 (8.8)   | 30 (7.3)          | 1.08 (0.59, 1.97) | 1.24 (0.67, 2.29) |
| Both    | 4 (1.7)                | 4 (1.0)    | 1.65 (0.41, 6.73) | 1.71 (0.41, 7.21) |                   |
| Males   | Parental migration     |            |                   |                   |                   |
|         | No                     | 83 (79.8)  | 129 (77.7)        | 1                 | 1                 |
|         | Yes                    | 21 (20.2)  | 37 (22.3)         | 0.76 (0.41, 1.42) | 0.65 (0.34, 1.24) |
| Females | Parental migration     |            |                   |                   |                   |
|         | No                     | 95 (70.4)  | 192 (78.7)        | 1                 | 1                 |
|         | Yes                    | 40 (29.6)  | 52 (21.3)         | 1.36 (0.84, 2.23) | 1.44 (0.87, 2.38) |

Model 1 – adjusted for age and sex

Model 2 – adjusted for age, sex, ethnicity, religion, childhood SEP

*Supplementary material for manuscript: Is being a left-behind child associated with an increased risk of self-poisoning in adulthood? – findings from a case control study in Sri Lanka*

**Supplementary table 2 - Adjusted and sex-stratified associations of parental emigration and hospital presentation for self-poisoning in adulthood (All available data)**

|         |                        | OR 95% CI         |                   |
|---------|------------------------|-------------------|-------------------|
|         |                        | Model 1           | Model 2           |
| Overall | Parental migration     |                   |                   |
|         | No                     | 1                 | 1                 |
|         | Yes                    | 1.25 (0.87, 1.78) | 1.31 (0.88, 1.93) |
|         | Which parent migrated? |                   |                   |
|         | No migration           | 1                 | 1                 |
|         | Maternal               | 1.31 (0.85, 2.03) | 1.28 (0.79, 2.09) |
|         | Paternal               | 1.29 (0.72, 2.31) | 1.51 (0.82, 2.79) |
| Both    | 0.79 (0.27, 2.31)      | 0.83 (0.25, 2.75) |                   |
| Males   | Parental migration     |                   |                   |
|         | No                     | 1                 | 1                 |
|         | Yes                    | 0.86 (0.49, 1.53) | 1.57 (0.99, 2.48) |
| Females | Parental migration     |                   |                   |
|         | No                     | 1                 | 1                 |
|         | Yes                    | 0.95 (0.50, 1.81) | 1.70 (1.02, 2.81) |
